# Supplementary material
Source: PubMed Central journal article supplement (PMC6457092)
Supplement: nutrition213165supplementarydata1.pdf [file nutrition213165supplementarydata1.pdf]

Online Supporting Material

Supplemental Table 1 Top 30 consumed food groups in ENSANUT among children 2-13y

| Food Group                                                   | Example                                           | Percent Consuming |
|--------------------------------------------------------------|---------------------------------------------------|-------------------|
| Tortillas (plain)                                            | Corn or wheat tortillas                           | 68                |
| All Cow, whole                                               | Whole fat cow's milk                              | 40                |
| Non-baby food fruit, fresh & frozen                          | Fresh apples, bananas, oranges, etc.              | 36                |
| Dried beans & peas                                           | Cooked beans, refried beans, lentil soup          | 34                |
| Eggs & egg dishes                                            | Scrambled eggs, eggs with sausage                 | 34                |
| Carbonated sodas                                             | Bottled soda drinks (cola, orange, etc.)          | 33                |
| Sandwiches, tortas, filled rolls                             | Ham sandwich, cheese quesadilla                   | 32                |
| Sweet breads                                                 | Breads and doughnuts made with added sugars       | 31                |
| Sweetened tea and coffee                                     | Coffee/tea with sugar, with or without milk       | 30                |
| Soups, stews, broths & creams                                | Pasta soup, chicken broth with chicken            | 27                |
| Salty snacks from grains/starchy vegetables                  | Potato chips, chicharron, popcorn                 | 26                |
| Aguas frescas                                                | Fruit-flavored water                              | 25                |
| Candy                                                        | Hard candy, chocolates                            | 23                |
| Cookies                                                      | Sweet cookies                                     | 21                |
| Fruit-flavored drinks & baby's commercial fruit drink        | Fruit drinks, fruit ices (not 100% juice)         | 16                |
| Non-infant cereal                                            | Ready-to-eat cereals                              | 15                |
| Rice mixed dishes                                            | Artificially sweetened beverages                  | 15                |
| Bread, rolls, biscuits, bagels, plain or with savory topping | Breads made without added sugars                  | 12                |
| Non-baby juice                                               | Fresh or canned 100% fruit juice                  | 11                |
| Non-babyfood meats, chicken or turkey                        | Chicken, roasted, grilled, or fried               | 11                |
| All non-baby/toddler raw                                     | Salad, carrots, cucumber, guacamole               | 10                |
| Meat tacos                                                   | Tortillas filled with beef, egg, chicken, sausage | 10                |
| Non-babyfood meats, beef                                     | Beef stew, beefsteak                              | 10                |
| Beef or pork with vegetables and/or rice/pasta/potatoes      | Beef hash, potatoes with sausage                  | 9                 |
| Water & milk-based atoles                                    | Rice, oats, or cornstarch with water or milk      | 9                 |
| Baby yogurt                                                  | Yogurt for children and babies                    | 8                 |
| Pasta mixed dishes                                           | Spaghetti with cream, meat, or other sauce        | 8                 |
| Chicken or turkey with vegetables and/or rice/pasta          | Chicken stew, chicken with vegetables             | 7                 |
| Non-baby yogurt                                              | Fruit yogurt, yogurt with fruit or cereal         | 7                 |
| Ice cream, frozen yogurt, puddings                           | Ice cream, ice milk popsicles                     | 6                 |

**Online Supporting Material**

Supplement Table 2. Per consumer energy intake across the day (breakfast, lunch, dinner, snacks), by age group among children 2-13y old participating in the Mexican National Health and Nutrition Survey, 2012 ( $n=5,093$ )

| Energy intake in kcal/day at: | 2-5y     |               | 6-13 y   |               |
|-------------------------------|----------|---------------|----------|---------------|
|                               | <i>n</i> | Mean $\pm$ SE | <i>n</i> | Mean $\pm$ SE |
| Breakfast                     | 1724     | 383 $\pm$ 9   | 2448     | 482 $\pm$ 11  |
| Almuerzo                      | 915      | 376 $\pm$ 16  | 1438     | 535 $\pm$ 15  |
| Lunch                         | 1868     | 441 $\pm$ 15  | 2682     | 626 $\pm$ 15  |
| Dinner                        | 1639     | 361 $\pm$ 12  | 2464     | 473 $\pm$ 11  |
| Morning snack                 | 1012     | 257 $\pm$ 11  | 1202     | 349 $\pm$ 23  |
| Afternoon snack               | 1092     | 244 $\pm$ 9   | 1352     | 339 $\pm$ 16  |
| Evening snack                 | 322      | 180 $\pm$ 12  | 217      | 226 $\pm$ 24  |
| Total snacks                  | 1535     | 379 $\pm$ 13  | 2000     | 463 $\pm$ 18  |
| Total meals                   | 2038     | 1199 $\pm$ 22 | 2992     | 1598 $\pm$ 20 |
| Total daily energy intake     | 2039     | 1484 $\pm$ 22 | 2992     | 1910 $\pm$ 23 |
